# Supplementary material for: Dual mode of extraction for Cs+ and Na+ ions with dicyclohexano-18-crown-6 and bis(2-propyloxy)calix[4]crown-6 in ionic liquids: density functional theoretical investigation
Source: Royal Society of Chemistry journal article supplement (doi:10.1039/c4ra02246g), 2014-01-01
Supplement: c4ra02246g1.pdf [file c4ra02246g1.pdf]

## Electronic supplementary information

### Dual mode of extraction for Cs<sup>+</sup> and Na<sup>+</sup> ions with di-cyclohexano-18-crown-6 and bis-(2-propyloxy)-calix[4]-crown-6 in ionic liquids: Density Functional Theoretical investigation

Sk. M. Ali<sup>\*#</sup>, J.M. Joshi, A. Singha Deb, A. Boda, K.T. Shenoy and S.K. Ghosh

Chemical Engineering Division,  
Bhabha Atomic Research Centre, Mumbai, 400 085, India.  
<sup>#</sup>Homi Bhabha National Institute, Mumbai, 400 085, India.

\*corresponding author

Table.S1 : Calculated structural parameters of DCH18C6 at different level of DFT functional and basis

| Method     | C-C (Å)                    | C-O (Å)                                                                                  | O-O (Å)             |
|------------|----------------------------|------------------------------------------------------------------------------------------|---------------------|
| BP86/SVP   | 1.521, 1.521, 1.517, 1.517 | 1.412, 1.420, 1.421, 1.416,<br>1.412, 1.413, 1.412, 1.412,<br>1.415, 1.412, 1.410, 1.410 | 5.461, 6.062, 5.805 |
| B3LYP/SVP  | 1.518, 1.517, 1.514, 1.514 | 1.412, 1.416, 1.413, 1.408,<br>1.405, 1.402, 1.402, 1.405,<br>1.408, 1.405, 1.405, 1.406 | 5.432, 6.070, 5.811 |
| TPSSH/SVP  | 1.517, 1.517, 1.513, 1.513 | 1.419, 1.416, 1.412, 1.417,<br>1.408, 1.407, 1.406, 1.409,<br>1.412, 1.408, 1.409, 1.417 | 5.468, 6.017, 5.770 |
| BP86/TZVP  | 1.516, 1.517, 1.513, 1.513 | 1.428, 1.423, 1.427, 1.430,<br>1.422, 1.421, 1.421, 1.423,<br>1.420, 1.419, 1.419, 1.420 | 5.503, 6.033, 5.787 |
| B3LYP/TZVP | 1.514, 1.523, 1.510, 1.510 | 1.418, 1.422, 1.419, 1.415,<br>1.414, 1.413, 1.413, 1.414,<br>1.412, 1.410, 1.411, 1.411 | 5.548, 6.065, 5.814 |
| TPSSH/TZVP | 1.514, 1.514, 1.510, 1.510 | 1.423, 1.426, 1.422, 1.418,<br>1.415, 1.414, 1.414, 1.415,<br>1.419, 1.416, 1.417, 1.417 | 5.514, 6.015, 5.743 |

set.

**Table.S2:** Calculated structural parameters of Cs<sup>+</sup> ion -DCH18C6 complex at different level of DFT and basis set.

| Method     | C-C( Å)                       | C-O( Å)                                                                                      | O-O( Å)             | M-O( Å)                                        |
|------------|-------------------------------|----------------------------------------------------------------------------------------------|---------------------|------------------------------------------------|
| BP86/SVP   | 1.516, 1.517, 1.518,<br>1.518 | 1.439, 1.438, 1.428,<br>1.430, 1.423, 1.422,<br>1.422, 1.424, 1.423,<br>1.422, 1.423, 1.422  | 4.704, 5.886, 5.937 | 3.138, 3.138,<br>3.126, 3.287,<br>3.218, 3.120 |
| B3LYP/SVP  | 1.513, 1.514, 1.514,<br>1.514 | 1.431, 1.420, 1.430,<br>1.422, 1.415, 1.414,<br>1.414, 1.414, 1.416,<br>1.415, 1.415, 1.414, | 4.724, 5.874, 5.929 | 3.139, 3.139,<br>3.125, 3.295,<br>3.221, 3.123 |
| TPSSH/SVP  | 1.513, 1.513, 1.514,<br>1.514 | 1.434, 1.426, 1.434,<br>1.423, 1.420, 1.418,<br>1.418, 1.419, 1.419,<br>1.419, 1.418, 1.419  | 4.701, 5.851, 5.906 | 3.132, 3.132,<br>3.282, 3.111,<br>3.116, 3.215 |
| BP86/TZVP  | 1.511, 1.511, 1.512,<br>1.512 | 1.438, 1.445, 1.445,<br>1.433, 1.429, 1.431,<br>1.433, 1.430, 1.432,<br>1.431, 1.430, 1.430  | 4.666, 5.865, 5.922 | 3.110, 3.094,<br>3.261, 3.100,<br>3.095, 3.188 |
| B3LYP/TZVP | 1.509, 1.509,<br>1.509,1.509  | 1.436, 1.429, 1.436,<br>1.426, 1.421, 1.423,<br>1.422, 1.422, 1.423,<br>1.422, 1.422, 1.422  | 4.688, 5.863, 5.921 | 3.126, 3.126,<br>3.287, 3.114,<br>3.116, 3.210 |
| TPSSH/TZVP | 1.509, 1.509,<br>1.509,1.509  | 1.439, 1.439, 1.430,<br>1.434, 1.424, 1.426,<br>1.425, 1.425, 1.427,<br>1.426, 1.426, 1.425  | 4.670, 5.905, 5.808 | 3.109, 3.088,<br>3.079, 3.262,<br>3.092, 3.169 |

**Table.S3:** Calculated structural parameters of Na<sup>+</sup> ion -DCH18C6 complex at different level of DFT and basis set.

| Method     | C-C( Å)                       | C-O( Å)                                                                                     | O-O( Å)             |                                                |
|------------|-------------------------------|---------------------------------------------------------------------------------------------|---------------------|------------------------------------------------|
| BP86/SVP   | 1.512, 1.508, 1.513,<br>1.523 | 1.444, 1.439, 1.430,<br>1.438, 1.424, 1.427,<br>1.425, 1.430, 1.427,<br>1.423, 1.423, 1.425 | 4.872, 5.023, 4.796 | 2.510, 2.581,<br>2.710, 2.420,<br>2.608, 2.411 |
| B3LYP/SVP  | 1.508, 1.515, 1.509,<br>1.519 | 1.421, 1.430, 1.434,<br>1.430, 1.416, 1.419,<br>1.417, 1.422, 1.419,<br>1.415, 1.415, 1.418 | 4.855, 5.014, 4.774 | 2.50, 2.571,<br>2.706, 2.597,<br>2.410, 2.396  |
| TPSSH/SVP  | 1.508, 1.519, 1.509,<br>1.519 | 1.434, 1.438, 1.426,<br>1.434, 1.420, 1.423,<br>1.421, 1.426, 1.422,<br>1.419, 1.419, 1.421 | 4.843, 5.010, 4.766 | 2.495, 2.564,<br>2.396, 2.595,<br>2.410, 2.609 |
| BP86/TZVP  | 1.507, 1.512, 1.512,<br>1.508 | 1.450, 1.444, 1.444,<br>1.436, 1.430, 1.434,<br>1.433, 1.435, 1.433,<br>1.430, 1.432, 1.436 | 4.939, 5.122, 5.254 | 2.535, 2.601,<br>2.663, 2.467,<br>2.444, 2.734 |
| B3LYP/TZVP | 1.505, 1.510, 1.505,<br>1.515 | 1.439, 1.435, 1.435,<br>1.427, 1.421, 1.426,<br>1.424, 1.427, 1.424,<br>1.421, 1.421, 1.423 | 4.913, 5.097, 4.827 | 2.520, 2.597,<br>2.740, 2.633,<br>2.432, 2.417 |
| TPSSH/TZVP | 1.505, 1.510, 1.505,<br>1.515 | 1.444, 1.439, 1.431,<br>1.439, 1.425, 1.429,<br>1.428, 1.431, 1.428,<br>1.426, 1.425, 1.426 | 4.890, 5.084, 4.821 | 2.514, 2.577,<br>2.643, 2.421,<br>2.437, 2.715 |

**Table.S4:** Calculated structural parameters of BPC6 at different level of DFT functional and basis set.

| Method |            | C-C ( Å)                             | C-O( Å)                                                                                     | O-O( Å)                                                                                     |                                                                                             |
|--------|------------|--------------------------------------|---------------------------------------------------------------------------------------------|---------------------------------------------------------------------------------------------|---------------------------------------------------------------------------------------------|
| Basis  | Functional |                                      |                                                                                             |                                                                                             |                                                                                             |
| SVP    | BP86       | 1.523, 1.521, 1.530,<br>1.521, 1.519 | 1.378, 1.387, 1.425,<br>1.423, 1.411, 1.412,<br>1.413, 1.412, 1.415,<br>1.416, 1.413, 1.415 | 6.998, 6.422, 6.729                                                                         |                                                                                             |
|        |            | B3LYP                                | 1.516, 1.518, 1.518,<br>1.526, 1.520                                                        | 1.381, 1.374, 1.417,<br>1.406, 1.407, 1.409,<br>1.407, 1.405, 1.406,<br>1.404, 1.404, 1.416 | 6.451, 6.866, 6.816                                                                         |
|        |            |                                      | TPSSH                                                                                       | 1.518, 1.517, 1.526,<br>1.517, 1.515                                                        | 1.376, 1.383, 1.419,<br>1.408, 1.409, 1.410,<br>1.409, 1.411, 1.413,<br>1.411, 1.409, 1.421 |
|        | TZVP       | BP-86                                | 1.513, 1.516, 1.525,<br>1.525, 1.516                                                        | 1.392, 1.382, 1.434,<br>1.433, 1.418, 1.419,<br>1.420, 1.420, 1.420,<br>1.423, 1.423, 1.421 | 6.473, 7.038, 6.541                                                                         |
|        |            | B3LYP                                | 1.513, 1.5111, 1.521,<br>1.512, 1.514                                                       | 1.384, 1.377, 1.425,<br>1.413, 1.415, 1.416,<br>1.412, 1.412, 1.412,<br>1.411, 1.410, 1.424 | 6.465, 6.970, 6.656                                                                         |
|        |            | TPSSH                                | 1.510, 1.513, 1.521,<br>1.512, 1.513                                                        | 1.387, 1.37, 1.430,<br>1.416, 1.418, 1.419,<br>1.415, 1.416, 1.416,<br>1.414, 1.414, 1.428  | 6.473, 6.953, 6.591                                                                         |

**Table.S5:** Calculated structural parameters of Cs<sup>+</sup> ion-BPC6 complex at different level of DFT and basis set.

| Method |                      | C-C( Å)              | C-O( Å)              | O-O( Å)             | M-O( Å)       |
|--------|----------------------|----------------------|----------------------|---------------------|---------------|
| Basis  | Functional           |                      |                      |                     |               |
| SVP    | BP86                 | 1.514, 1.514, 1.523, | 1.400, 1.394, 1.438, | 6.459, 6.597, 6.291 | 3.256, 3.261, |
|        |                      | 1.518, 1.518         | 1.420, 1.422, 1.420, |                     | 3.327, 3.445, |
|        |                      |                      | 1.420, 1.421, 1.421, |                     | 3.497, 3.264  |
|        | B3LYP                | 1.511, 1.511, 1.519, | 1.395, 1.389, 1.429, | 6.452, 6.552, 6.295 | 3.269, 3.258, |
|        |                      | 1.515, 1.515         | 1.430, 1.413, 1.414, |                     | 3.268, 3.324, |
|        |                      |                      | 1.412, 1.412, 1.413, |                     | 3.431, 3.446  |
| TPSSH  | 1.515, 1.514, 1.519, | 1.391, 1.396, 1.433, | 6.549, 6.430, 6.271  | 3.235, 3.251,       |               |
|        | 1.511, 1.511         | 1.416, 1.416, 1.416, |                      | 3.261, 3.316,       |               |
|        |                      | 1.417, 1.416, 1.416, |                      | 3.446, 3.463        |               |
| TZVP   | BP86                 | 1.508, 1.509, 1.519, | 1.405, 1.398, 1.446, | 6.430, 6.599, 6.278 | 3.253, 3.248, |
|        |                      | 1.513, 1.513         | 1.427, 1.429, 1.428, |                     | 3.257, 3.323, |
|        |                      |                      | 1.427, 1.427, 1.426, |                     | 3.426, 3.507  |
|        | B3LYP                | 1.511, 1.510, 1.516, | 1.392, 1.398, 1.436, | 6.587, 6.436, 6.288 | 3.255, 3.281, |
|        |                      | 1.506, 1.506         | 1.419, 1.418, 1.418, |                     | 3.257, 3.323, |
|        |                      |                      | 1.419, 1.419, 1.420, |                     | 3.416, 3.467  |
| TPSSH  | 1.507, 1.507, 1.516, | 1.400, 1.394, 1.441, | 6.42, 6.502, 6.278   | 3.246, 3.254,       |               |
|        | 1.510, 1.511         | 1.423, 1.425, 1.423, |                      | 3.322, 3.257,       |               |
|        |                      | 1.423, 1.423, 1.422, |                      | 3.421, 3.472        |               |
|        |                      | 1.422, 1.422, 1.440, |                      |                     |               |

**Table.S6:** Calculated structural parameters of Na<sup>+</sup> ion -BPC6 complex at different level of DFT and basis set.

| Method     | C-C( Å)                              | C-O( Å)                                                                                     | O-O( Å)             | M-O( Å)                                        |
|------------|--------------------------------------|---------------------------------------------------------------------------------------------|---------------------|------------------------------------------------|
| BP86/SVP   | 1.515, 1.517, 1.525,<br>1.516, 1.518 | 1.404, 1.408, 1.446,<br>1.428, 1.434, 1.415,<br>1.424, 1.414, 1.415,<br>1.423, 1.448, 1.414 | 5.798, 6.967, 5.123 | 2.382, 2.424,<br>2.468, 3.980,<br>5.013, 4.265 |
| B3LYP/SVP  | 1.513, 1.514, 1.521,<br>1.513, 1.513 | 1.399, 1.403, 1.433,<br>1.422, 1.427, 1.407,<br>1.416, 1.406, 1.407,<br>1.416, 1.406, 1.440 | 5.676, 6.973, 5.079 | 2.362, 2.394,<br>2.424, 3.979,<br>5.014, 4.193 |
| TPSSH/SVP  | 1.515, 1.512, 1.521,<br>1.514, 1.512 | 1.404, 1.400, 1.444,<br>1.410, 1.419, 1.411,<br>1.410, 1.419, 1.411,<br>1.430, 1.424, 1.436 | 6.937, 5.687, 5.080 | 2.398, 2.362,<br>3.963, 2.438,<br>4.980, 4.189 |
| BP86/TZVP  | 1.514, 1.511, 1.520,<br>1.512, 1.510 | 1.409, 1.407, 1.453,<br>1.420, 1.429, 1.423,<br>1.420, 1.430, 1.420,<br>1.439, 1.433, 1.447 | 5.780, 6.971, 5.152 | 2.401, 2.439,<br>2.489, 3.946,<br>4.186, 4.941 |
| B3LYP/TZVP | 1.511, 1.509, 1.517,<br>1.509, 1.508 | 1.404, 1.401, 1.446,<br>1.412, 1.421, 1.414,<br>1.412, 1.422, 1.412,<br>1.431, 1.426, 1.438 | 6.97, 5.712, 5.146  | 2.428, 2.387,<br>3.964, 2.474,<br>4.959, 4.156 |
| TPSSH/TZVP | 1.507, 1.509, 1.517,<br>1.509, 1.511 | 1.402, 1.405, 1.442,<br>1.428, 1.434, 1.415,<br>1.425, 1.416, 1.418,<br>1.424, 1.416, 1.449 | 5.728, 6.944, 5.118 | 2.427, 2.387,<br>2.478, 4.155,<br>4.922, 3.940 |

**Table.S7:** Calculated values of binding energy of Cs<sup>+</sup> and Na<sup>+</sup> ion with DCH18C6 and BPC6 at different M06 suite of density functionals using TZ2P basis set.

| System | BE (kcal/mol) |        |        |        |        |        |
|--------|---------------|--------|--------|--------|--------|--------|
|        | DCH18C6       |        |        | BPC6   |        |        |
|        | M06-L         | M06    | M06-2X | M06-L  | M06    | M06-2X |
| Cs     | -65.89        | -70.88 | -63.97 | -79.86 | -83.89 | -75.34 |
| Na     | -88.19        | -91.91 | -95.05 | -90.84 | -92.74 | -96.00 |

**Table.S8:** Calculated values of HOMO-LUMO energy of Cs<sup>+</sup> and Na<sup>+</sup> ion with DCH18C6 at different DFT functional and basis set.

| System      | HOMO-LUMO (eV) |       |       |      |       |       |
|-------------|----------------|-------|-------|------|-------|-------|
|             | SVP            |       |       | TZVP |       |       |
|             | BP86           | B3LYP | TPSSH | BP86 | B3LYP | TPSSH |
| DCH18C6     | 5.99           | 7.70  | 7.18  | 5.71 | 7.28  | 6.77  |
| Cs- DCH18C6 | 5.56           | 6.85  | 6.32  | 5.72 | 7.02  | 6.50  |
| Na- DCH18C6 | 6.03           | 7.63  | 7.08  | 5.83 | 7.35  | 6.78  |
| BPC         | 3.88           | 5.44  | 4.85  | 3.95 | 5.48  | 4.89  |
| Cs-BPC      | 4.00           | 5.61  | 4.96  | 3.98 | 5.56  | 4.92  |
| Na-BPC      | 4.01           | 5.64  | 4.97  | 3.98 | 5.61  | 4.93  |

**Table.S9:** Calculated values of second order stabilization energies  $E_{ij}^{(2)}$  using NBO analysis as implemented in ADF Package at B3LYP/TZ2P level of theory.

| System                  | Donor NBO   | Acceptor NBO | E2(kcal/mol) |
|-------------------------|-------------|--------------|--------------|
| DCH18C6-Cs <sup>+</sup> | LP ( 1) O21 | LP*( 1)Cs63  | 0.78         |
|                         | LP ( 1) O22 | LP*( 1)Cs63  | 0.85         |
|                         | LP ( 1) O23 | LP*( 1)Cs63  | 0.60         |
|                         | LP ( 1) O24 | LP*( 1)Cs63  | 0.68         |
|                         | LP ( 1) O25 | LP*( 1)Cs63  | 0.62         |
|                         | LP ( 1) O26 | LP*( 1)Cs63  | 0.65         |
| DCH18C6-Na <sup>+</sup> | LP ( 1) O21 | LP*( 1)Na27  | 3.11         |
|                         | LP ( 1) O22 | LP*( 1)Na27  | 3.54         |
|                         | LP ( 1) O23 | LP*( 1)Na27  | 3.79         |
|                         | LP ( 1) O24 | LP*( 1)Na27  | 3.25         |
|                         | LP ( 1) O25 | LP*( 1)Na27  | 3.72         |
|                         | LP ( 1) O26 | LP*( 1)Na27  | 3.99         |

**Table.S10.:** Calculated values of electron density and Laplacian of electron density at BP86/TZ2P level of theory using Bader's AIM calculation as implemented in ADF package.

| Complex                  | BCP   | $\lambda_1$ | $\lambda_2$ | $\lambda_3$ | $\rho$ | $\nabla^2 \rho$ | $\varepsilon = (\lambda_1/\lambda_2) - 1$ |
|--------------------------|-------|-------------|-------------|-------------|--------|-----------------|-------------------------------------------|
| DCH18C6-Cs <sup>+</sup>  | Cs-O1 | -0.0112     | -0.0103     | 0.0712      | 0.0132 | 0.048           | 0.087                                     |
|                          | Cs-O2 | -0.011      | -0.010      | 0.0693      | 0.0127 | 0.048           | 0.100                                     |
|                          | Cs-O3 | -0.011      | -0.010      | 0.072       | 0.0133 | 0.050           | 0.100                                     |
|                          | Cs-O4 | -0.0086     | -0.0077     | 0.0574      | 0.0106 | 0.040           | 0.116                                     |
|                          | Cs-O5 | -0.0112     | -0.0106     | 0.0702      | 0.0103 | 0.048           | 0.056                                     |
|                          | Cs-O6 | -0.0073     | -0.0067     | 0.0497      | 0.0093 | 0.032           | 0.089                                     |
| DCH18C6- Na <sup>+</sup> | Na-O1 | -0.011      | -0.0099     | 0.082       | 0.0095 | 0.0612          | 0.111                                     |
|                          | Na-O2 | -0.011      | -0.011      | 0.087       | 0.0099 | 0.0644          | 0.000                                     |
|                          | Na-O3 | -0.0218     | -0.0203     | 0.146       | 0.016  | 0.104           | 0.073                                     |
|                          | Na-O4 | -0.008      | -0.0065     | 0.0612      | 0.0073 | 0.0464          | 0.230                                     |
|                          | Na-O5 | -0.0152     | -0.0144     | 0.108       | 0.0119 | 0.0784          | 0.055                                     |
|                          | Na-O6 | -0.0199     | -0.0185     | 0.139       | 0.015  | 0.100           | 0.075                                     |
| BPC6- Cs <sup>+</sup>    | Cs-O1 | -0.0078     | -0.0068     | 0.052       | 0.0094 | 0.0368          | 0.147                                     |
|                          | Cs-O2 | -0.0078     | -0.0068     | 0.0521      | 0.0095 | 0.0368          | 0.147                                     |
|                          | Cs-O3 | -0.0079     | -0.0070     | 0.052       | 0.0095 | 0.0368          | 0.128                                     |
|                          | Cs-O4 | -0.005      | -0.0048     | 0.035       | 0.0067 | 0.0256          | 0.041                                     |
|                          | Cs-O5 | -0.007      | -0.0066     | 0.046       | 0.0088 | 0.032           | 0.166                                     |
|                          | Cs-O6 | -0.0020     | -0.0015     | 0.0157      | 0.0031 | 0.0112          | 0.333                                     |
| BPC6- Na <sup>+</sup>    | Na-O1 | -0.020      | -0.017      | 0.135       | 0.0144 | 0.096           | 0.176                                     |
|                          | Na-O2 | -0.0169     | -0.0160     | 0.118       | 0.0129 | 0.080           | 0.056                                     |
|                          | Na-O3 | -0.022      | -0.020      | 0.152       | 0.016  | 0.096           | 0.100                                     |



**Table.S11:** Calculated values of free energy of extraction for Cs<sup>+</sup> and Na<sup>+</sup> ion using implicit and explicit solvation model in BMIM ionic liquid and octanol using optimized geometry in COSMO solvent of dielectric constant 10.3.

| Diluents        | Ligand  | $\Delta G_{\text{ext}}$<br>(kcal/mol) |                 | $\Delta\Delta G_{\text{ext}}$<br>(kcal/mol) | $\Delta\Delta\Delta G_{\text{ext}}$<br>(kcal/mol) |
|-----------------|---------|---------------------------------------|-----------------|---------------------------------------------|---------------------------------------------------|
| <b>BMIMTF2N</b> |         |                                       |                 |                                             |                                                   |
|                 |         | Cs <sup>+</sup>                       | Na <sup>+</sup> |                                             |                                                   |
| Implicit        | DCH18C6 | 2.28                                  | -3.89           | 6.17                                        | -10.14                                            |
|                 | BPC6    | -0.081                                | 3.88            | -3.97                                       |                                                   |
| Explicit        | DCH18C6 | -56.32(-10.62)                        | -48.36(-2.65)   | -7.96                                       | -10.14                                            |
|                 | BPC6    | -58.69(-12.98)                        | -40.58(5.12)    | -18.10                                      |                                                   |
| <b>octanol</b>  |         |                                       |                 |                                             |                                                   |
| Implicit        | DCH18C6 | 8.05                                  | 1.81            | 6.23                                        | -10.21                                            |
|                 | BPC6    | 5.47                                  | 9.45            | -3.98                                       |                                                   |
| Explicit        | DCH18C6 | -50.55(-4.85)                         | -42.65(3.05)    | -7.90                                       | -10.21                                            |
|                 | BPC6    | -53.13(-7.42)                         | -35.01(10.69)   | -18.11                                      |                                                   |

Values in the parentheses are calculated using cluster of water molecules.

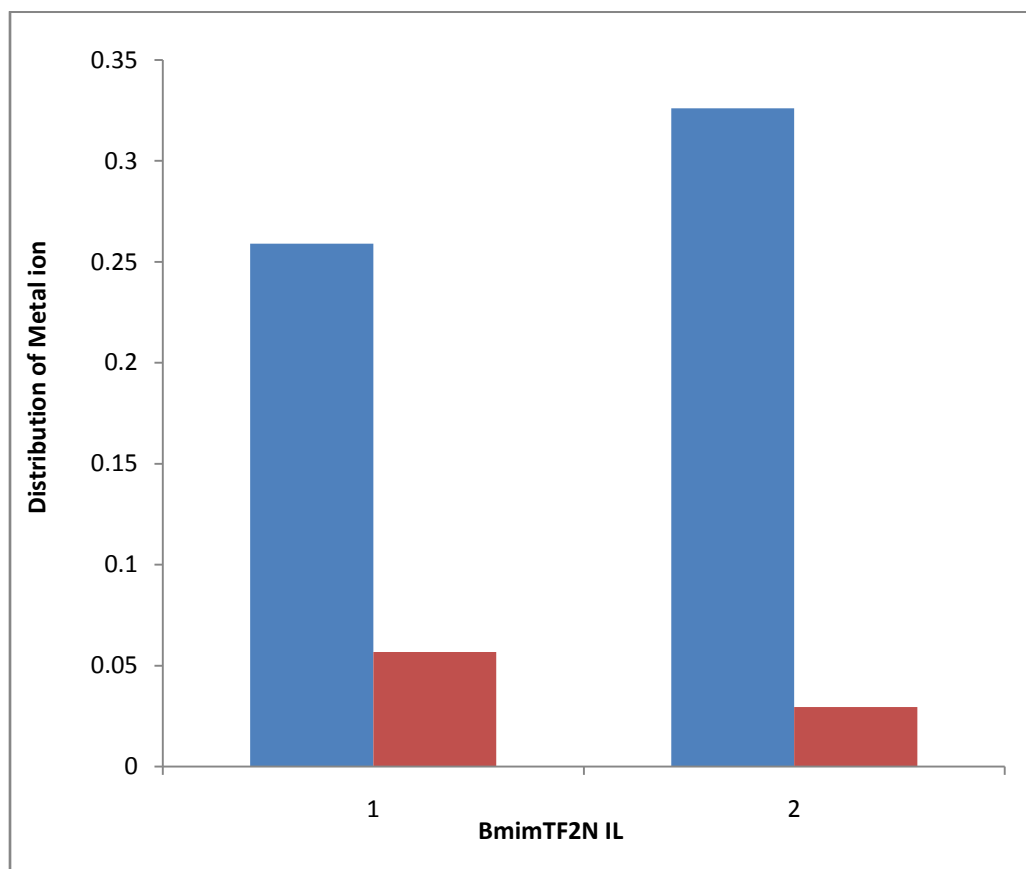

Fig.S1.: Extraction of Cs<sup>+</sup>, Na<sup>+</sup> ions from neutral chloride and nitrate solution with BMIMTF2N IL. Feed of Cs: 100 ppm; Na: 100 ppm; O/A 1:1, Stirring time: 0.5 hrs; Bath:1:1 water ethanol (1) D<sub>Cs</sub> and D<sub>Na</sub> in chloride salts; (2) D<sub>Cs</sub> and D<sub>Na</sub> in nitrate salts.

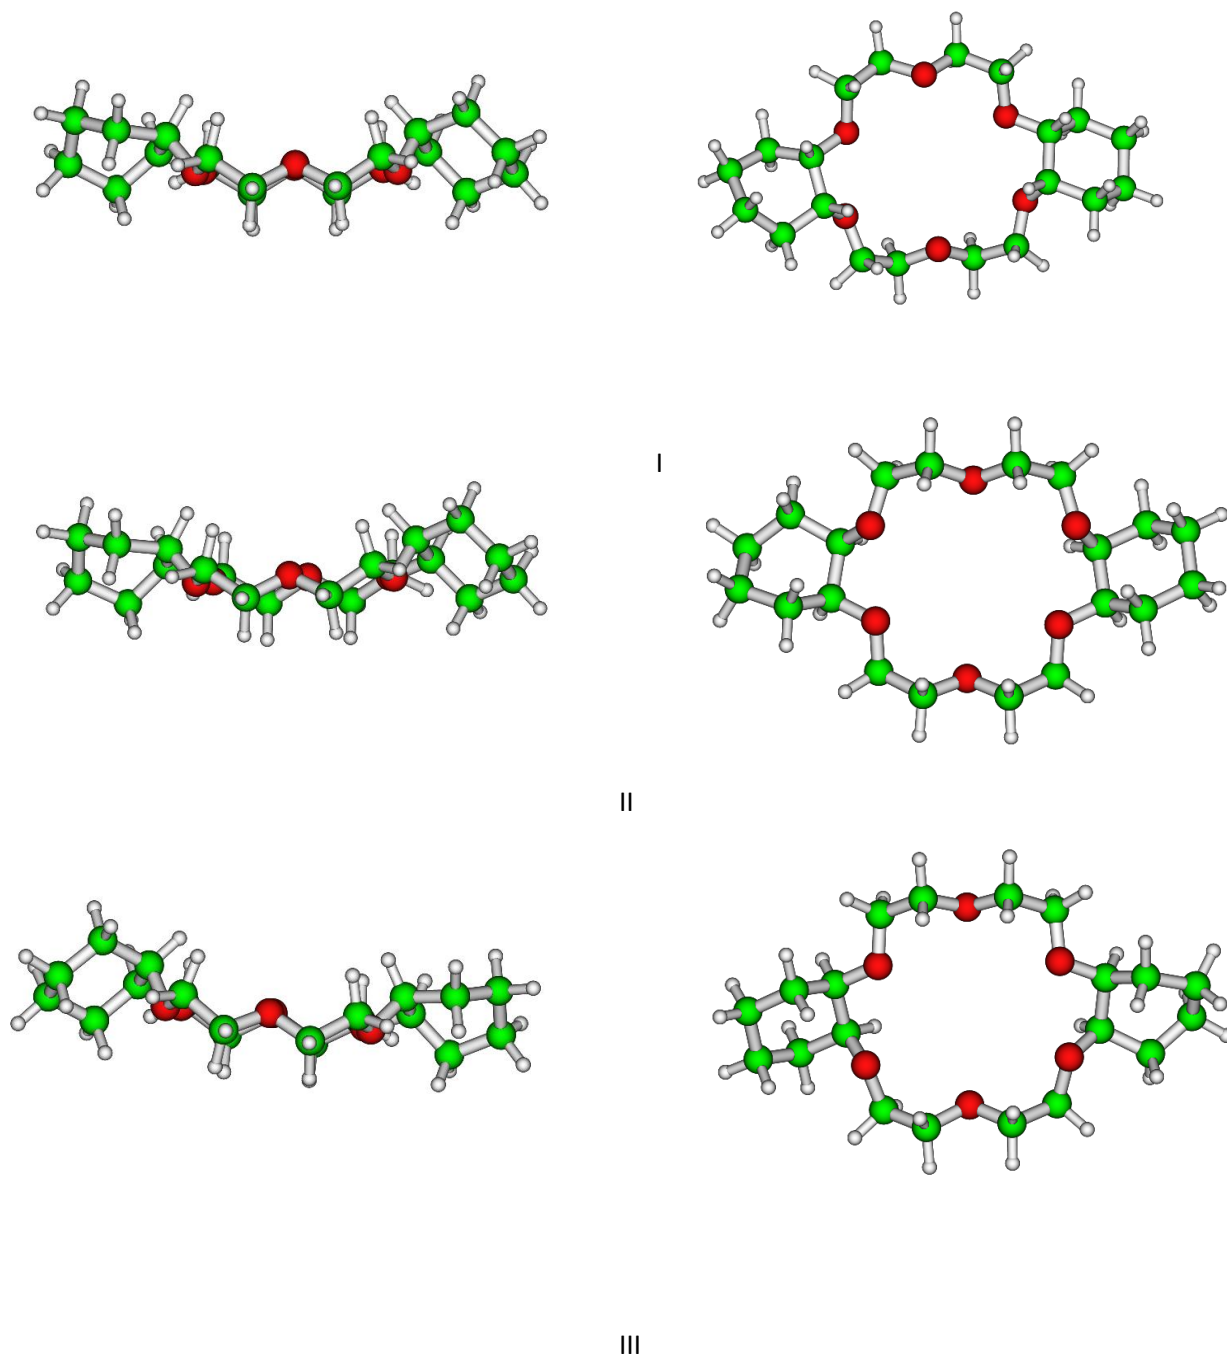

Fig.S2: Optimized minimum energy structure of free (a) DCH18C6 and (b) BPC at (I) BP86/SVP, (II) BP86/TZVP and (III) B3LYP/TZVP level of theories. Green, red and grey sphere represent the C, O and H atom respectively.

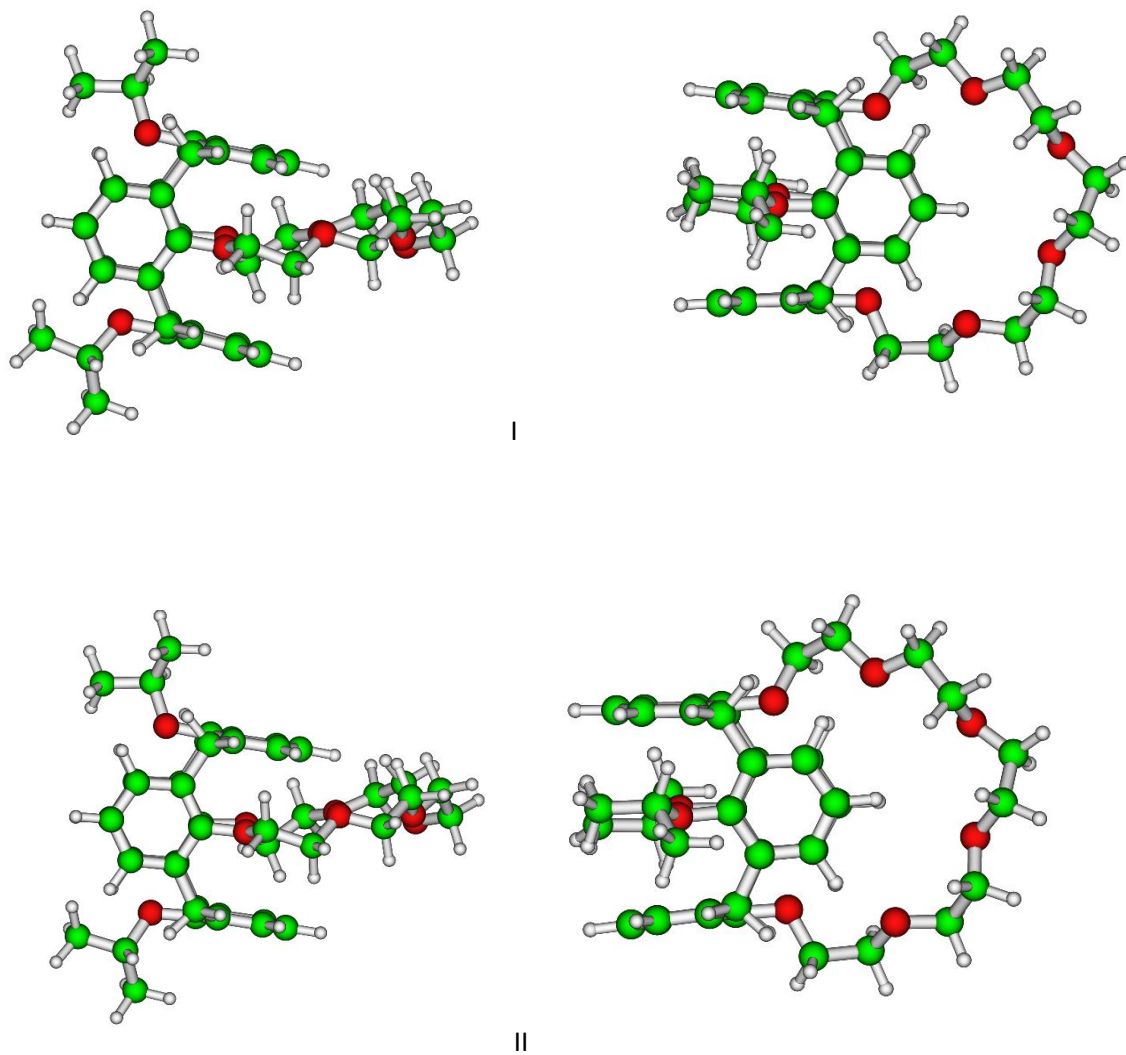

Figure.S3: Optimized minimum energy structure of free BPC6 using TZVP basis set at different level of DFT (I) BP86 and (II) B3LYP. Key is same as in Fig.S2

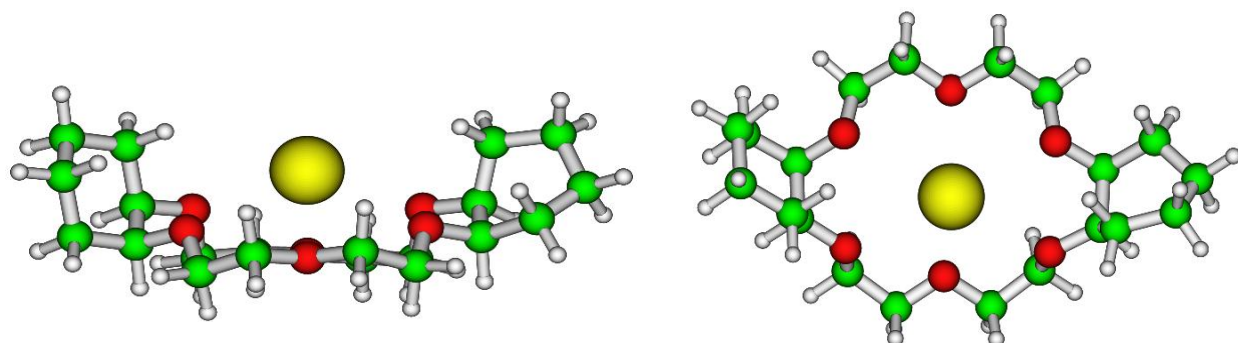

DCH18C6-Cs<sup>+</sup>-BP/SVP

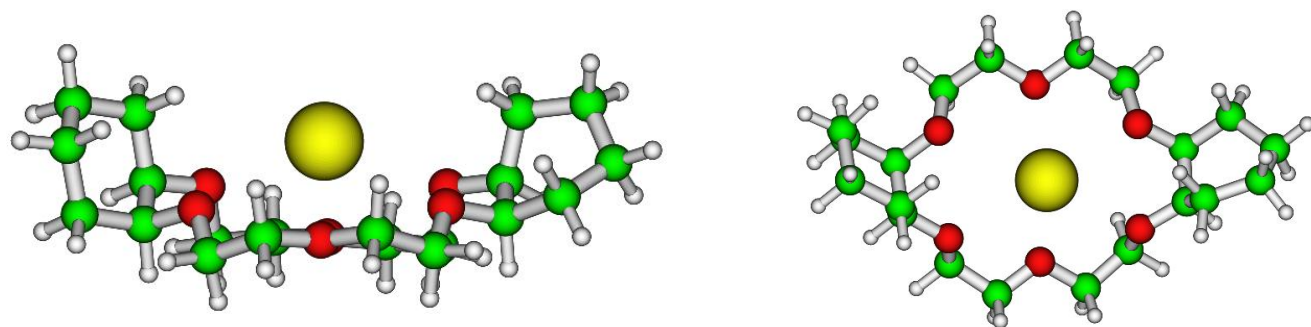

DCH18C6-Cs<sup>+</sup>-B3LYP/TZVP

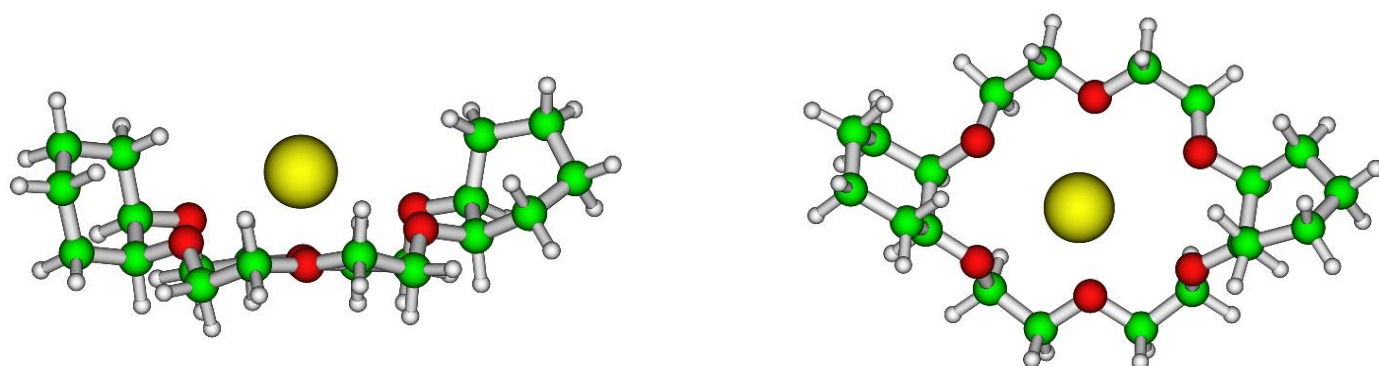

DCH18C6-Cs<sup>+</sup>-B3LYP/SVP

Figure.S4: Optimized minimum energy structure of Cs<sup>+</sup>-DCH18C6 complex at different level of DFT and basis set.

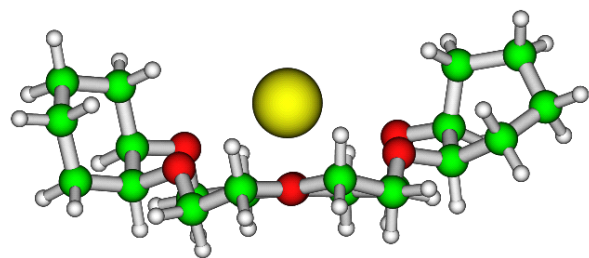

DCH18C6-Cs<sup>+</sup>-TPSSH/TZVP

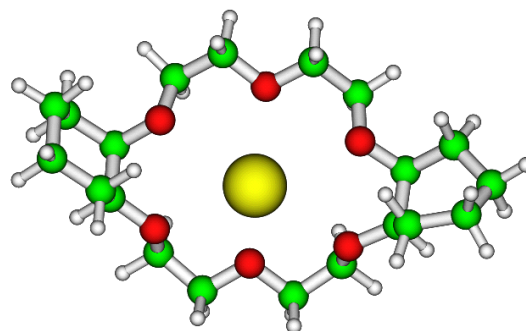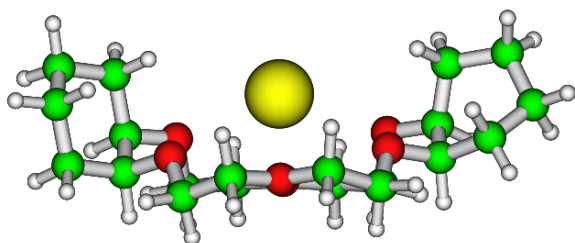

DCH18C6-Cs<sup>+</sup>-TPSSH/SVP

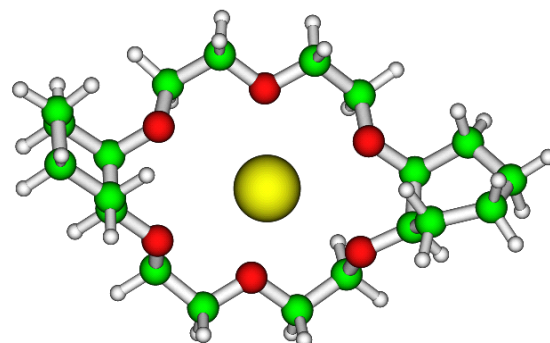

Figure.S5: Optimized minimum energy structure of Cs<sup>+</sup>-DCH18C6 complex at TPSSH level of theory with different basis set.

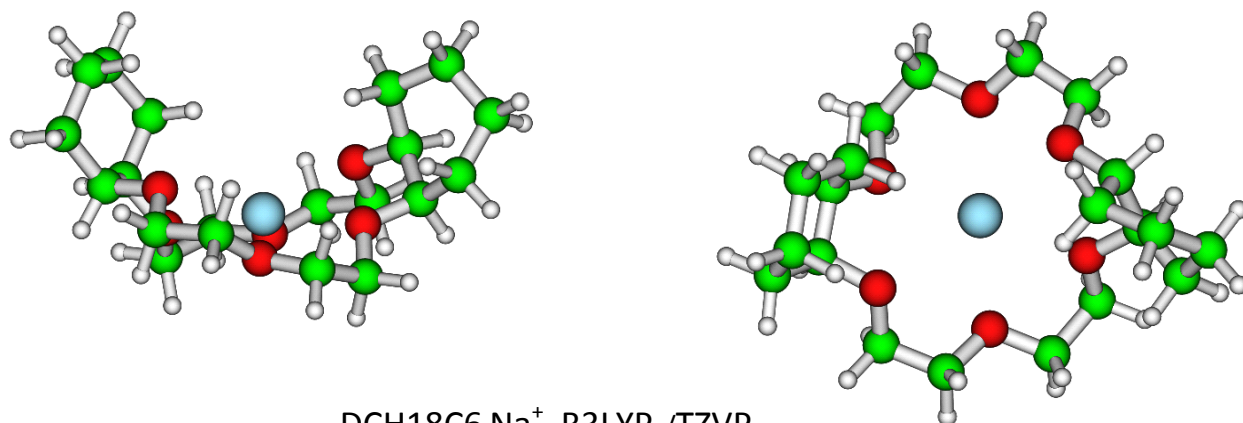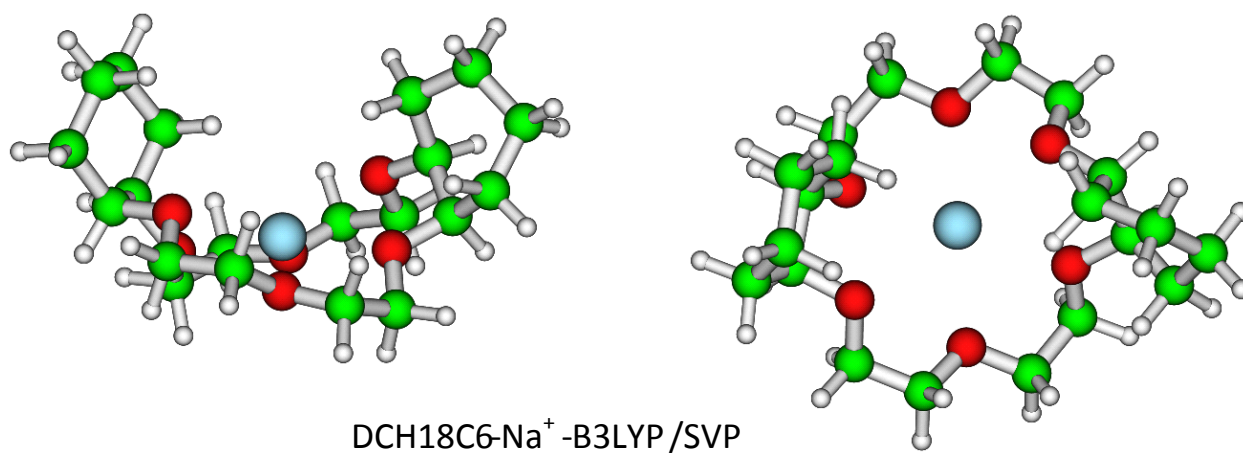

Figure.S6: Optimized minimum energy structure of Na<sup>+</sup>-DCH18C6 complex at B3LYP level of theory with different basis set.

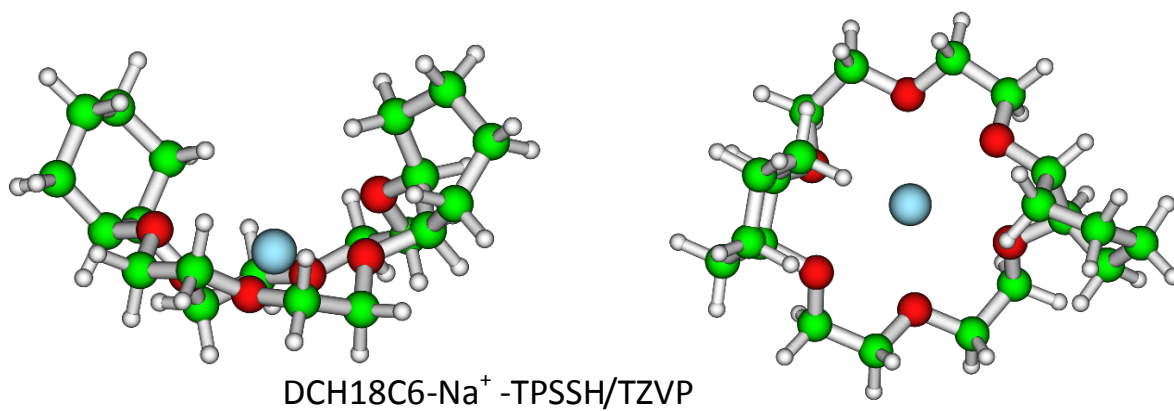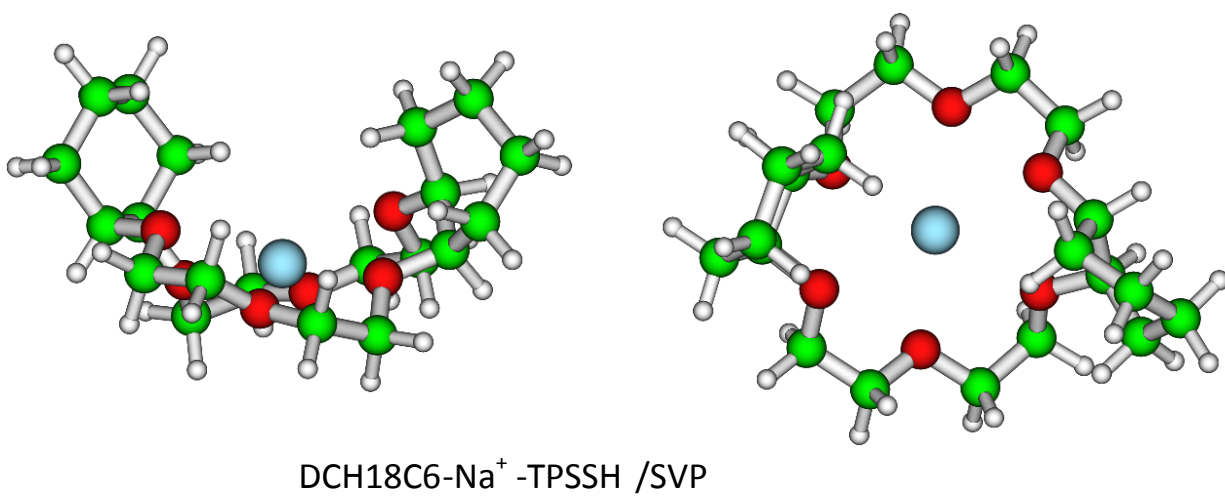

Figure.S7: Optimized minimum energy structure of  $\text{Na}^+$ -DCH18C6 complex at TPSSH level of theory with different basis set.



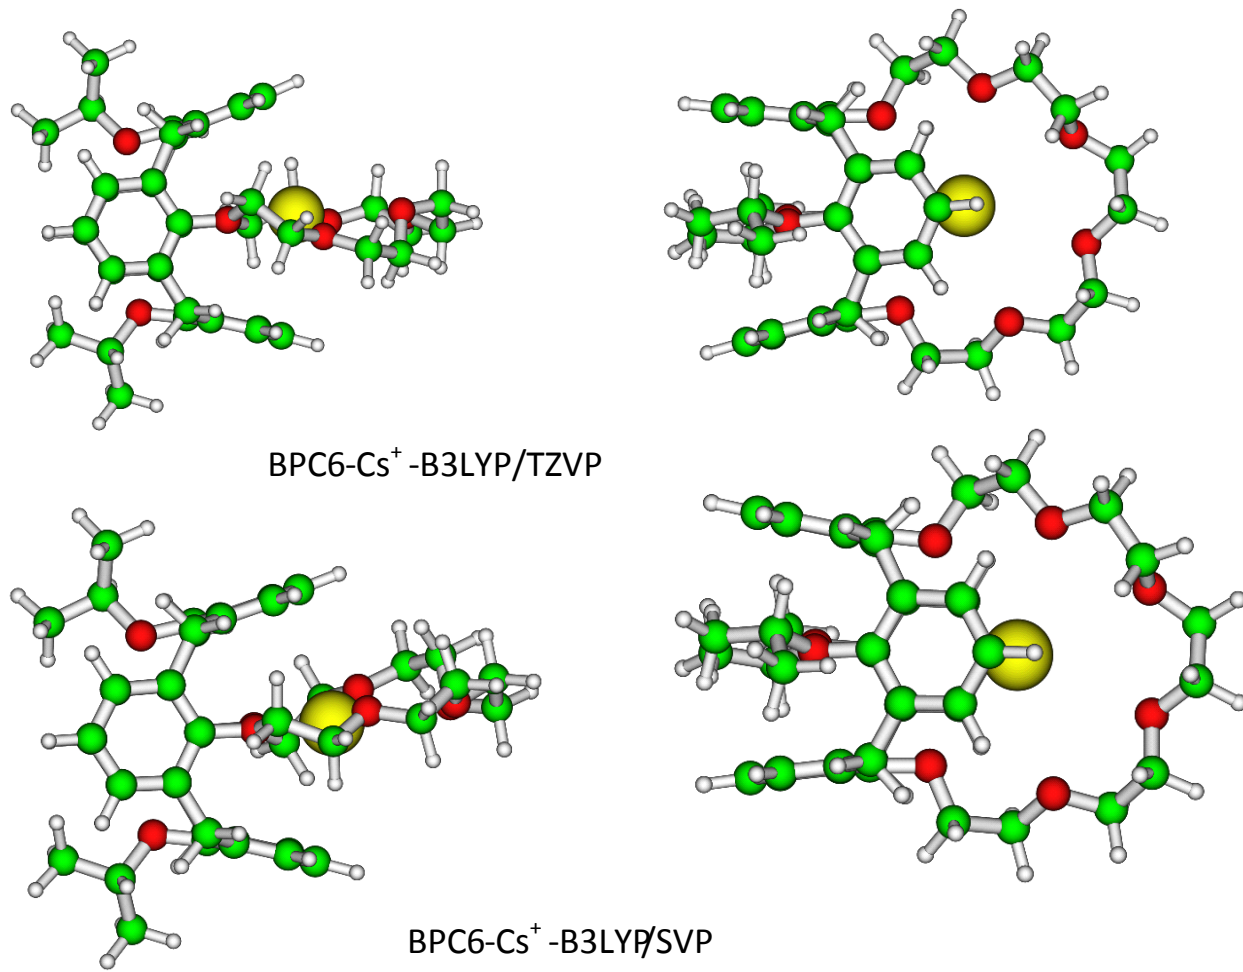

Figure.S8: Optimized minimum energy structure of Cs<sup>+</sup>-DCH18C6 complex at B3LYP level of theory with different basis set.

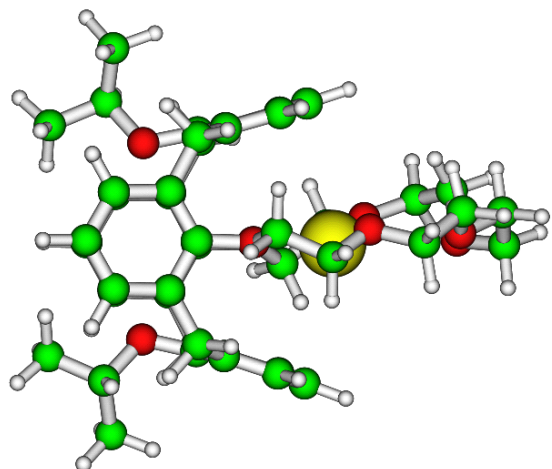

BPC6-Cs<sup>+</sup> -TPSSH /TZVP

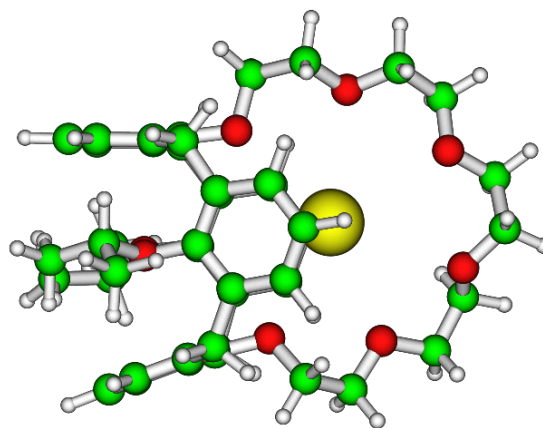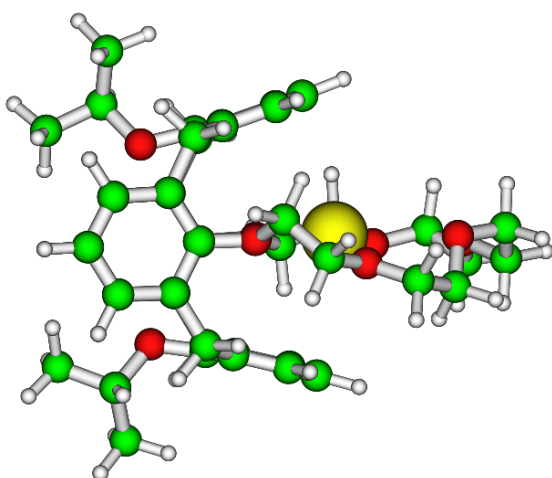

BPC6-Cs<sup>+</sup> -TPSSH/SVP

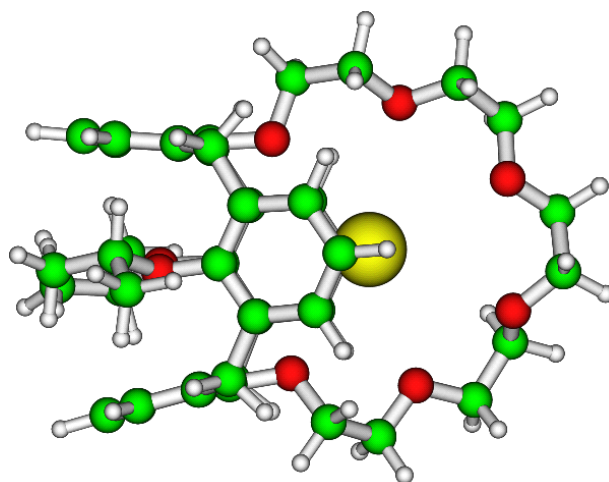

Figure.S9: Optimized minimum energy structure of Cs<sup>+</sup>-DCH18C6 complex at TPSSH level of theory with different basis set.

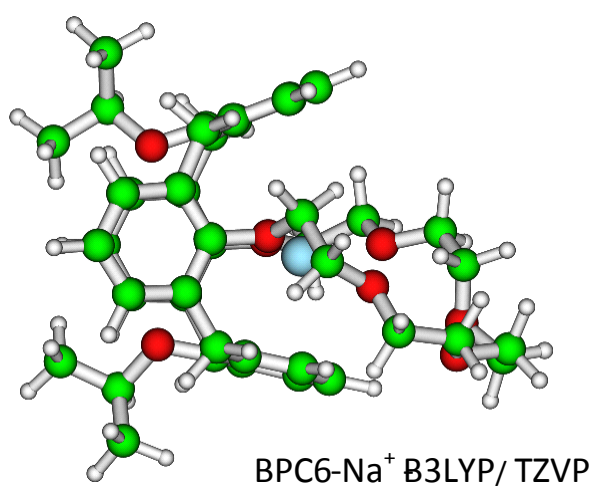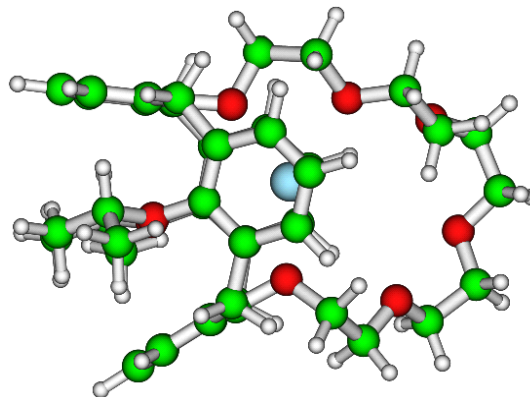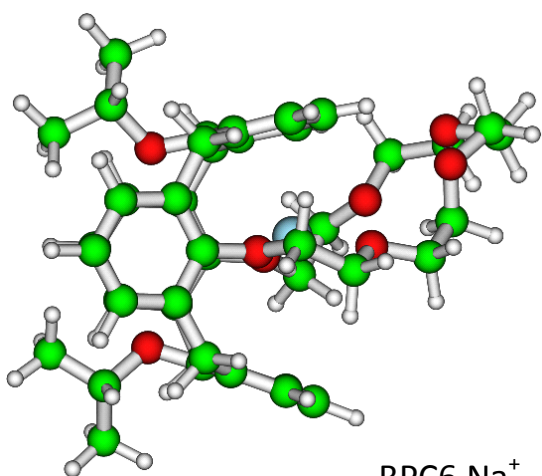

BPC6-Na<sup>+</sup> - B3LYP/ SVP

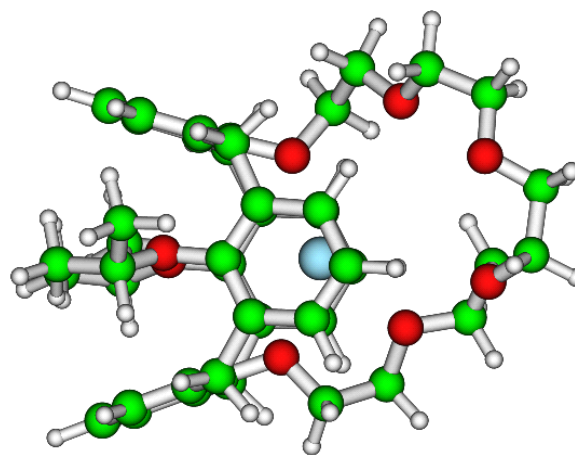

Figure.S10: Optimized minimum energy structure of Na<sup>+</sup>-DCH18C6 complex at B3LYP level of theory with different basis set.

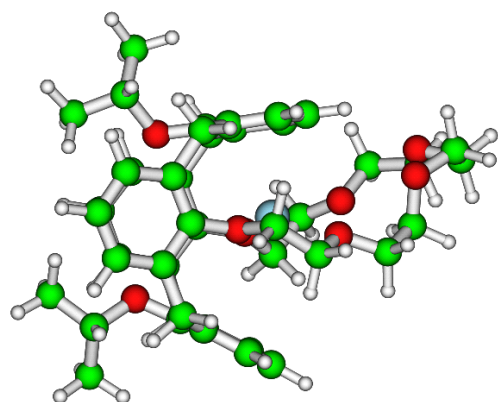

BPC6-Na<sup>+</sup> -TPSSH/TZVP

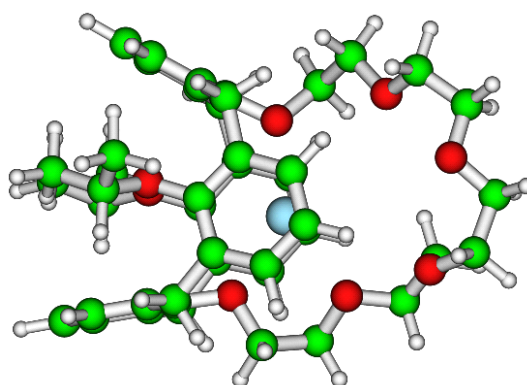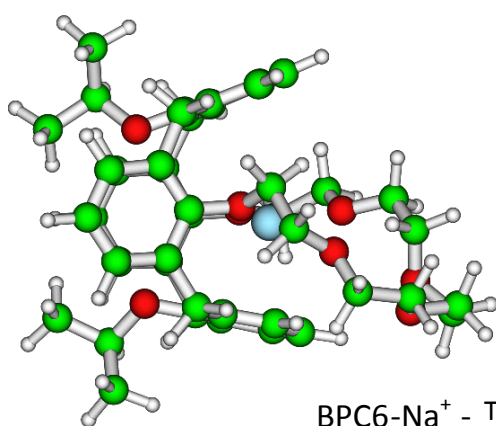

BPC6-Na<sup>+</sup> - TPSSH/SVP

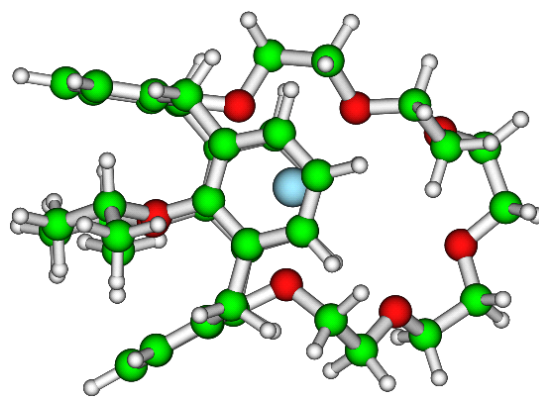

Figure.S11: Optimized minimum energy structure of Na<sup>+</sup>-DCH18C6 complex at TPSSH level of theory with different basis set.

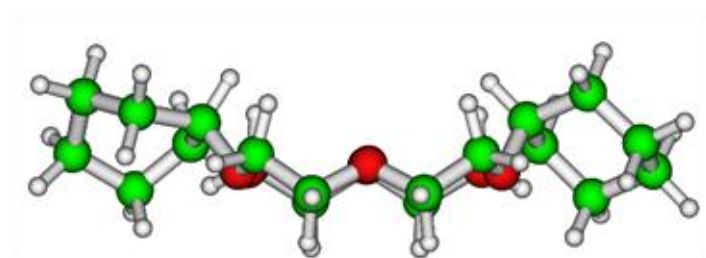

Side view

(I)

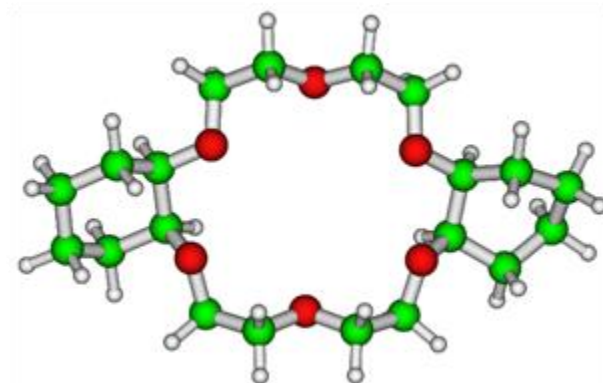

Top view

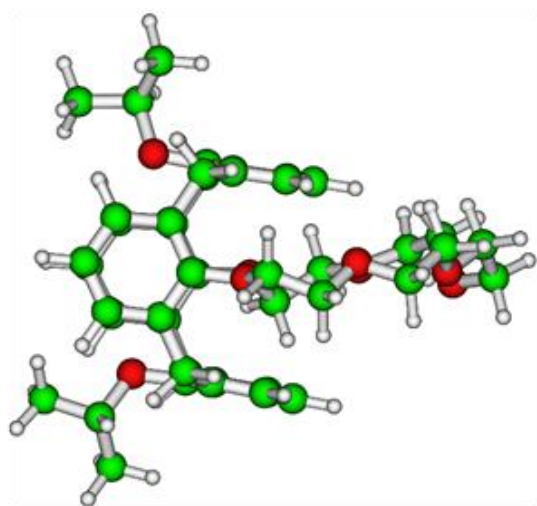

(II)

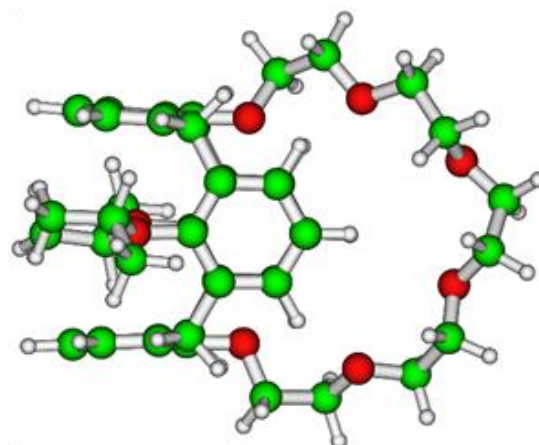

**Fig.S12:** Optimized minimum energy structure of free (I) DCH18C6 and (II) BPC at TPSSH/TZVP level of theory.

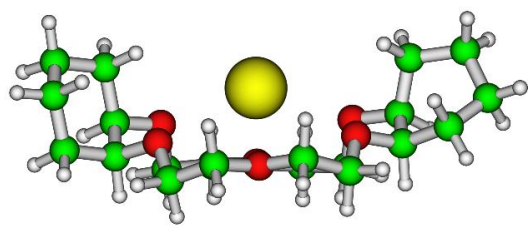

Side view

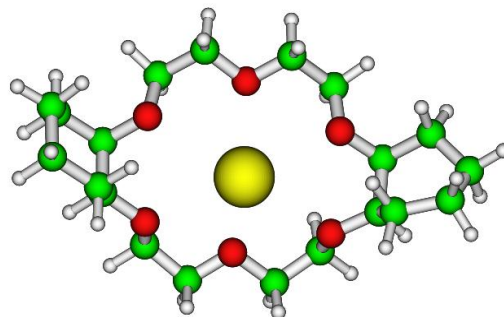

top view

I

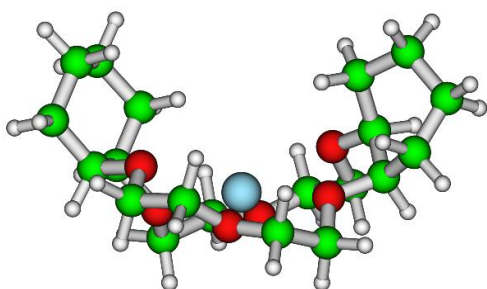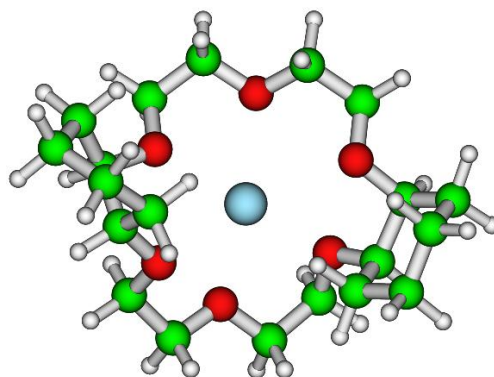

II

**Fig.S13:** Optimized minimum energy structure of  $\text{Cs}^+$  and  $\text{Na}^+$  complex of DCH18C6 using TPSSH/TZVP level of theory.

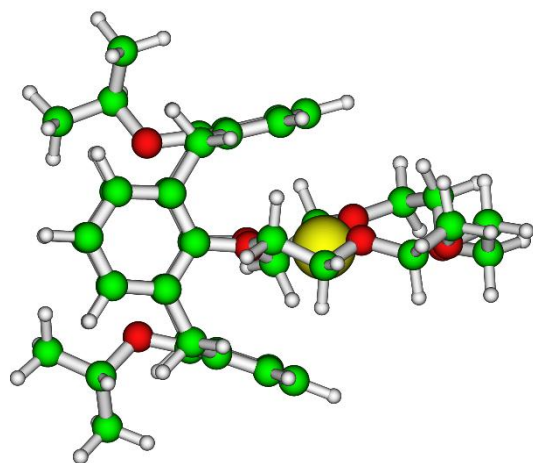

Side view

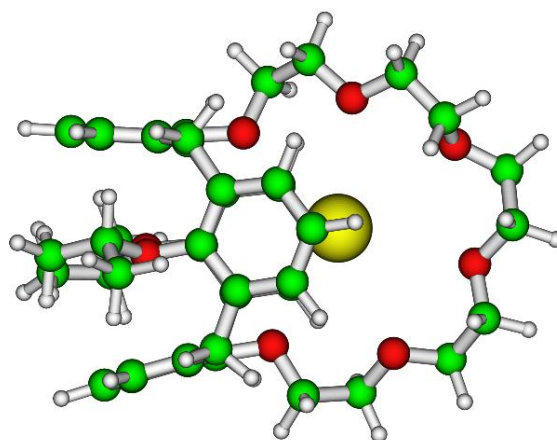

top view

I

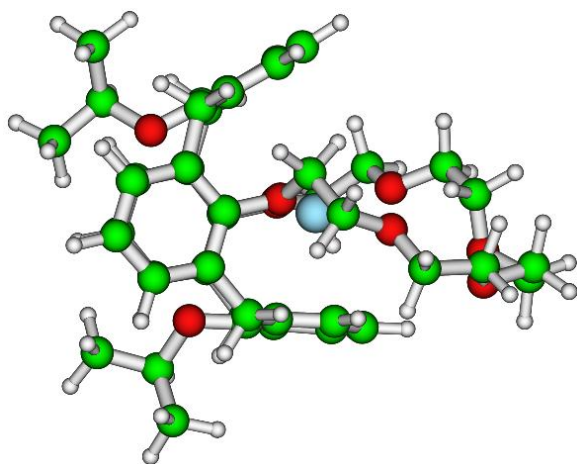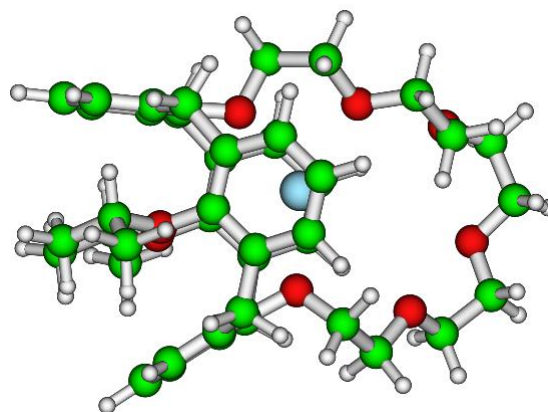

II

**Fig.S14:** Optimized minimum energy structure of Cs<sup>+</sup> and Na<sup>+</sup> complex of TPSSH/TZVP level of theory.

The reason for the close values of  $\Delta\Delta G$  and  $\Delta\Delta\Delta G$  in IL and octanol can be followed using the below equations.

**For e.g implicit**

Octanol solvent

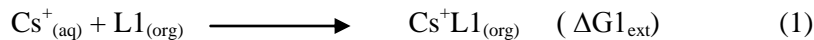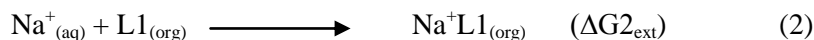

L1=DCH18C6

$$\Delta\Delta G_{\text{ext}} = (\Delta G1_{\text{ext}} - \Delta G2_{\text{ext}}) \quad (1)-(2) \text{ leads to}$$

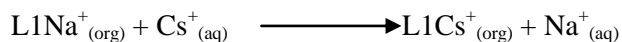

**IL solvent**

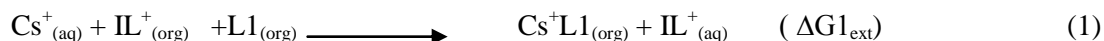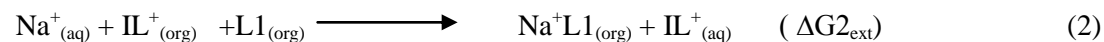

L1=DCH18C6

$$\Delta\Delta G_{\text{ext}} = (\Delta G1_{\text{ext}} - \Delta G2_{\text{ext}}) \quad (1)-(2) \text{ leads to}$$

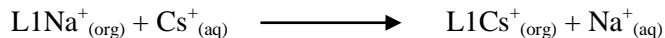

$\Delta G1_{\text{ext}}$  and  $\Delta G2_{\text{ext}}$  for both octanol and IL solvent are different this is due to different equations involved. Whereas  $\Delta\Delta G_{\text{ext}}$  is very close because of identical exchange and close dielectric constant for both octanol (10.3) and BMIMTF2N (11.6). Similarly, the  $\Delta\Delta\Delta G$  ( $\Delta\Delta\Delta G_{\text{ext}} = \Delta\Delta G[\text{L2}] - \Delta\Delta G[\text{L1}]$ ) can be shown to be very close.
